# Supplementary material for: LC567: a new 2D semimetallic carbon allotrope as a promising anode material for lithium-ion batteries
Source: Royal Society of Chemistry journal article supplement (doi:10.1039/d3cp01640d), 2023-01-01
Supplement: d3cp01640d2.pdf [file d3cp01640d2.pdf]

## Supplementary Information For

### LC<sub>567</sub>: A new 2D semimetallic carbon allotrope as a promising anode material for lithium-ion batteries

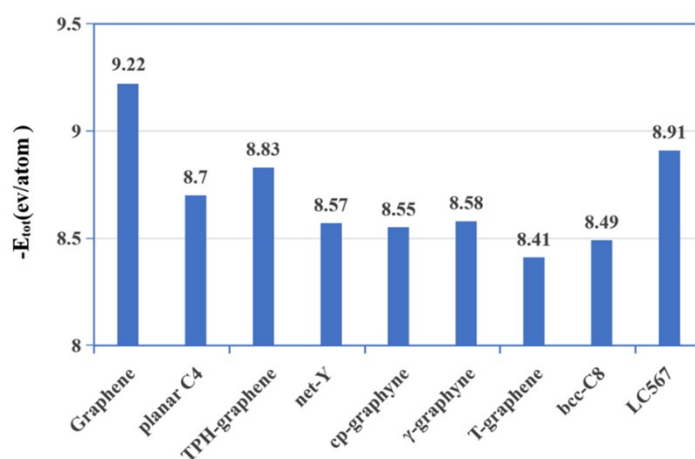

Figure S1. The total energy per atom for graphene allotrope.

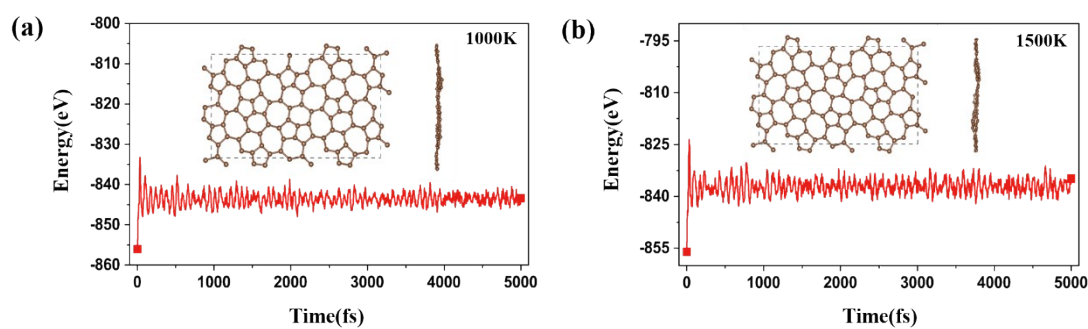

Figure S2. The change of total energy and structure of LC<sub>567</sub> with time at 1000 K and 1500 K.

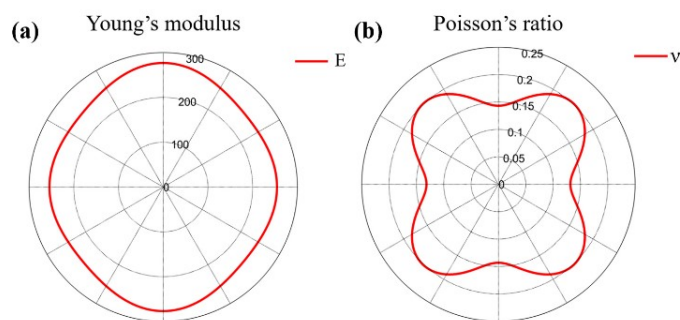

**Figure S3.** (a) Young's modulus in all directions of  $LC_{567}$ ; (b)  $LC_{567}$  Poisson's ratio in all directions.

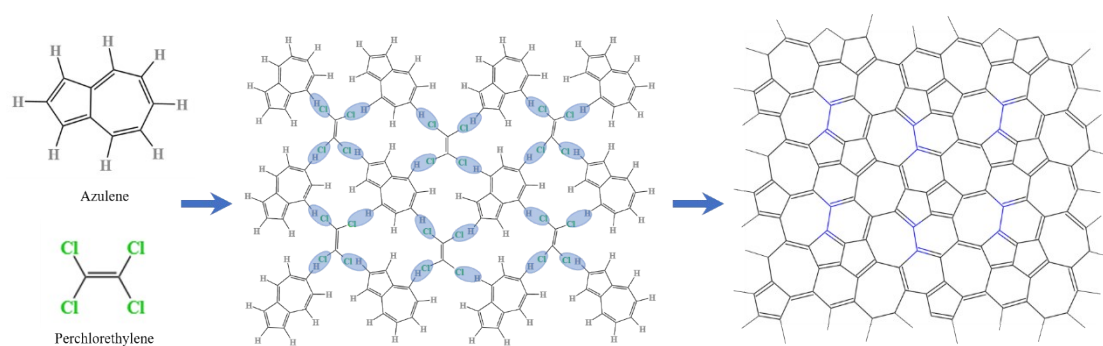

**Figure S4.** The flowchart of  $LC_{567}$  composed of azulene and perchloroethylene.

The  $LC_{567}$  can be made up of dehydrogenated azulene molecules and dechlorinated perchloroethylene molecules, here we propose a possible synthesis routine, as shown above. Firstly, azulene molecules and perchloroethylene molecules need to be arranged in an appropriate way; secondly, by fusing well-arranged molecules through H-Cl-zipping, C-C coupling are coupled between C-Cl and C-H moiety which are linked together through a self-assembly process; finally,  $LC_{567}$  is obtained. By calculating the energy before and after the reaction, the synthesis process is an exothermic reaction, which proves the feasibility of the reaction.

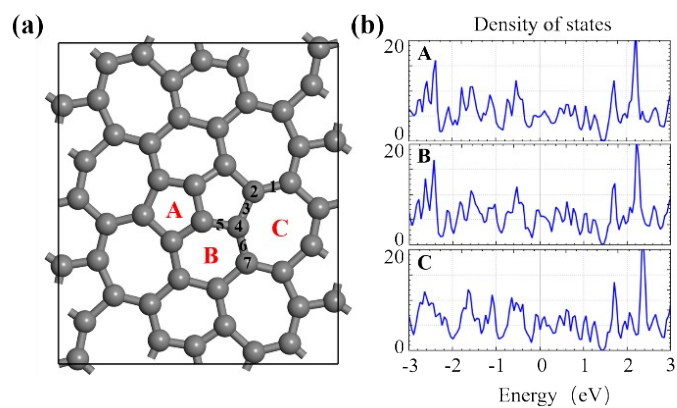

**Figure S5.** (a) Possible lithium adsorption sites on  $LC_{567}$  (top view); (b) Density of states for lithium-ion adsorption at different sites.

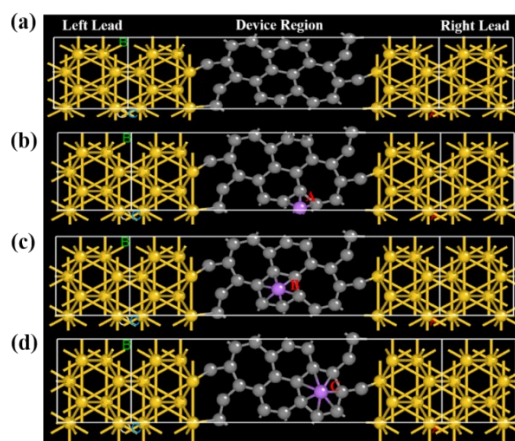

**Figure S6.** (a)- (d) The structures before and after adsorption are made into devices.

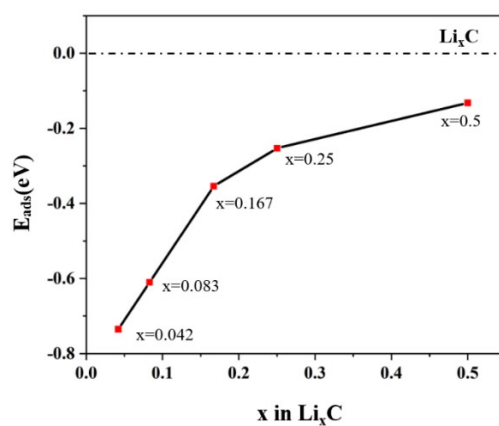

**Figure S7** The adsorption energy as a function of Li atoms.

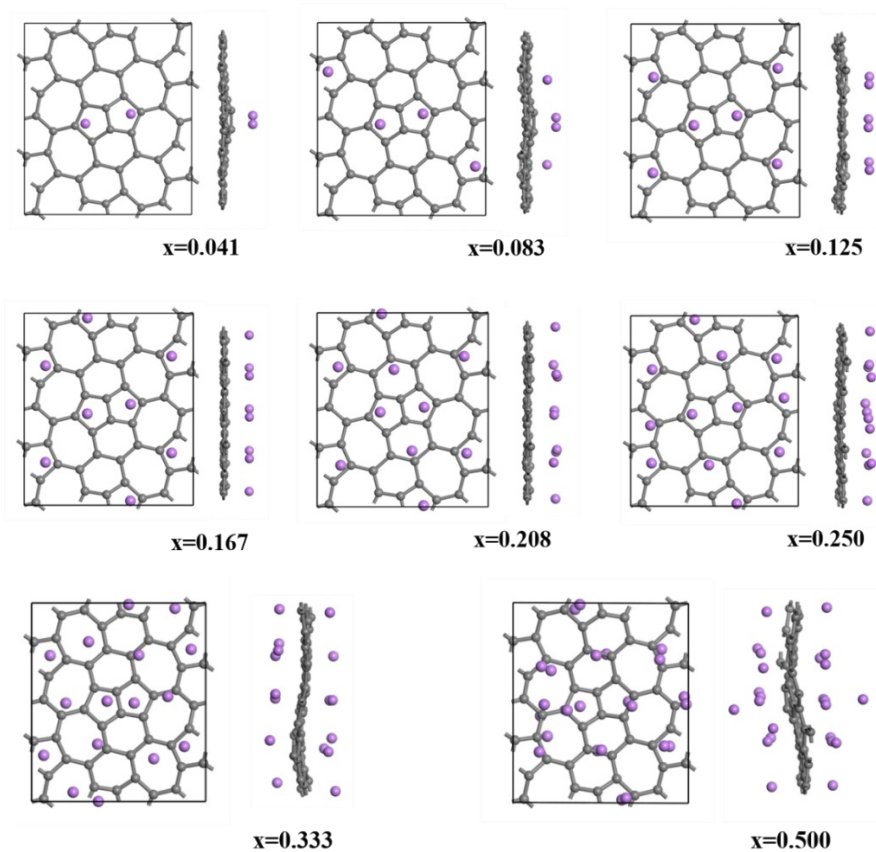

**Figure S8.** Structures of  $LC_{567}$  with various Li concentrations. In each partial, left show the top view and right side view.

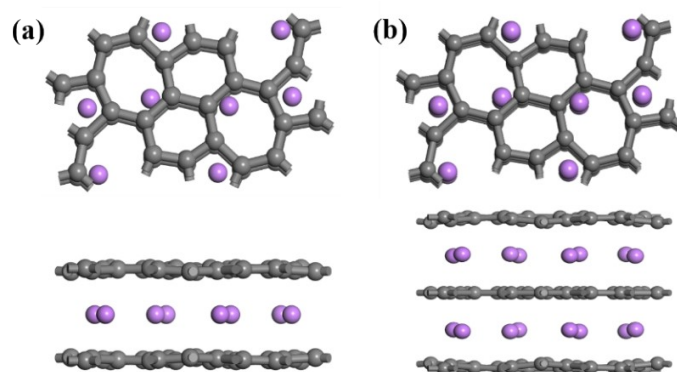

**Figure S9.** Structures of two- and three-layer  $LC_{567}$  with Li concentrations.

We calculate the adsorption energy of the maximum concentration for Li ions in two- and three-layer  $LC_{567}$ , and the energy are separately  $-0.885\text{eV}$  and  $-1.338\text{eV}$ , indicating the feasibility of Li ions adsorption for two-layer and three-layer  $LC_{567}$ . For a three-layer structure, the

maximum theoretical capacity is calculated as 496.9 mAhg<sup>-1</sup>, which is slightly fewer than the single-sided lithium storage in monolayers (558 mAhg<sup>-1</sup>).

**Type 1:**

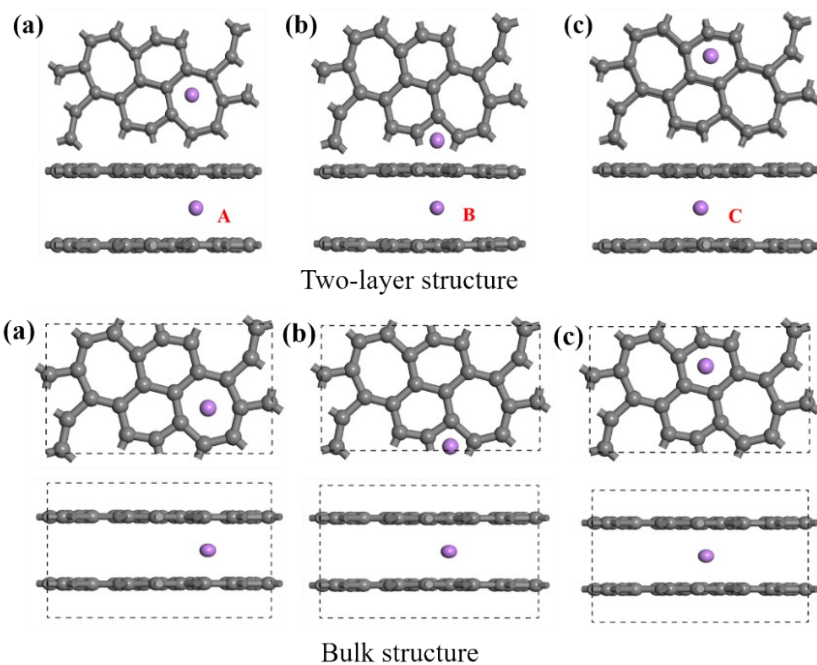

**Type 2:**

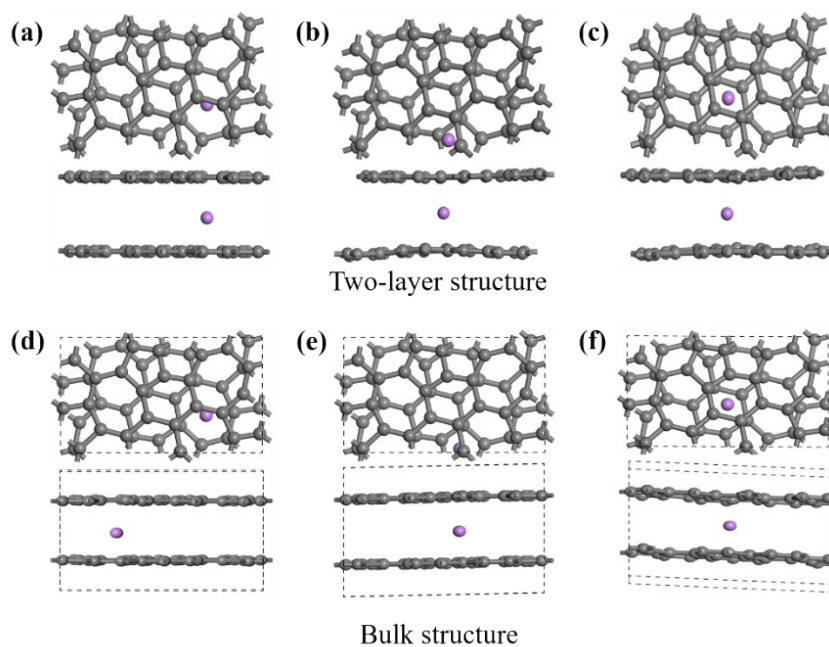

**Figure S10.** Adsorption of lithium atoms by two types of two-layer stacking structures and their bulk structures.

**Table S1.** The calculated lattice constant ( $a$ ,  $b$ , in Å), lattice change of LC<sub>567</sub> monolayer without and with adsorbed Li atoms.

|                       | $a$ (Å) | $b$ (Å) | Lattice variation (%) |       | Area variation (%) |
|-----------------------|---------|---------|-----------------------|-------|--------------------|
| C                     | 10.658  | 12.211  |                       |       |                    |
| Li <sub>0.041</sub> C | 10.661  | 12.211  | 0.028                 | -     | 0.028              |
| Li <sub>0.083</sub> C | 10.665  | 12.213  | 0.065                 | 0.016 | 0.082              |
| Li <sub>0.125</sub> C | 10.684  | 12.213  | 0.244                 | 0.016 | 0.260              |
| Li <sub>0.167</sub> C | 10.732  | 12.214  | 0.694                 | 0.025 | 0.719              |
| Li <sub>0.208</sub> C | 10.733  | 12.224  | 0.704                 | 0.106 | 0.811              |
| Li <sub>0.250</sub> C | 10.750  | 12.224  | 0.863                 | 0.106 | 0.971              |

**Table S2.** Structural information of various carbon allotropes and diffusion barriers of lithium ions on their surfaces.

| Name                            | Composition          | NEB (eV) |          |          |          |          |
|---------------------------------|----------------------|----------|----------|----------|----------|----------|
|                                 |                      | 5-5      | 5-6(6-5) | 5-7(7-5) | 7-7      | 6-7(7-6) |
| LC <sub>567</sub>               | 5-6-7 membered rings | 0.18     | 0.22     | 0.28     | 0.31     |          |
| MC <sub>567</sub>               | 5-6-7 membered rings |          | 0.26     | 0.31     |          | 0.33     |
| NC <sub>567</sub>               | 5-6-7 membered rings |          | 0.26     | 0.29     |          | 0.32     |
| $\psi$ -graphene <sup>[1]</sup> | 5-6-7 membered rings |          | 0.26     | 0.28     | 0.30     | 0.31     |
|                                 |                      | 5-5      | 5-8(8-5) | 5-6(6-5) | 6-8(8-6) |          |
| HC <sub>568</sub>               | 5-6-8 membered rings | 0.19     | 0.24     |          | 0.32     |          |
|                                 |                      | 5-5      | 5-8(8-5) | 8-8      |          |          |
| Popgraphene <sup>[2]</sup>      | 5-8 membered rings   | 0.24     | 0.36     | 0.31     |          |          |
| OPG_L <sup>[3]</sup>            | 5-8 membered rings   | 0.22     | 0.27     | 0.29     |          |          |
| OPG_Z <sup>[3]</sup>            | 5-8 membered rings   | 0.14     | 0.26     | 0.26     |          |          |

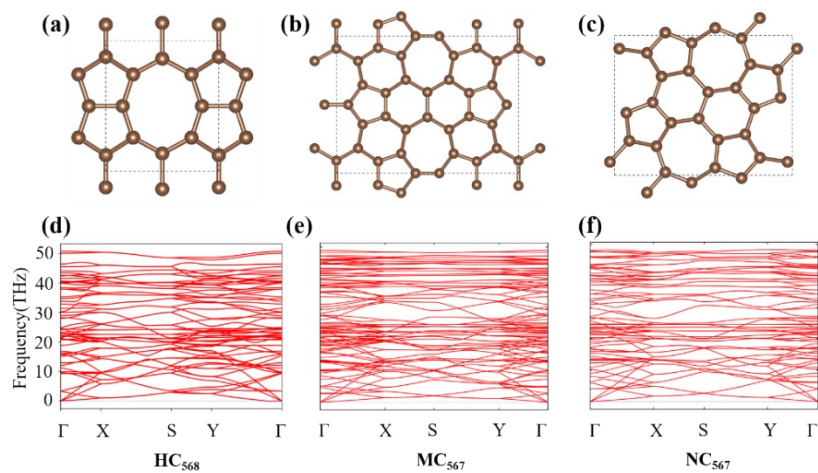

[1] Li, Xiaoyin, Qian Wang, and Puru Jena.  $\psi$ -Graphene: a new metallic allotrope of planar carbon with potential applications as anode materials for lithium-ion batteries. *The journal of physical chemistry letters* 8.14 (2017): 3234-3241.

[2] Wang, Shuai wei, et al. Popgraphene: a new 2D planar carbon allotrope composed of 5–8–5 carbon rings for high-performance lithium-ion battery anodes from bottom-up programming. *Journal of Materials Chemistry A* 6.16 (2018): 6815-6821.

[3] Gao, Peng fei, et al. OPGs: promising anode materials with high specific capacity and rate capability for Li/Na ion batteries. *Nanoscale* 10.37 (2018): 17942-17948.
